# Supplementary material
Source: publisher figshare collection journal article supplement (https://karger.figshare.com/ndownloader/files/14670290)
Supplement: Supplementary file 1 [file 14670290]

**Bone markers sclerostin, osteoprotegerin, and bone-specific alkaline phosphatase are related to insulin resistance in children and adolescents independent from their association with growth and obesity**

***Supporting information***

Juraj Stanik 1,2,3, Jürgen Kratzsch 4, Kathrin Landgraf 1,5, Mandy Vogel 6, Joachim Thiery 4, Wieland Kiess 1,6, Antje Körner 1,5,6

1Center for Pediatric Research Leipzig, University Hospital for Children & Adolescents, University of Leipzig, Liebigstraße 21, 04103 Leipzig, Germany

2First Department of Pediatrics, Medical Faculty at the Comenius University, Limbova 1, 833 40 Bratislava, Slovakia

3DIABGENE Laboratory, Institute of Experimental Endocrinology, Biomedical Research Center, Slovak Academy of Sciences, Dubravska cesta 9, 845 05 Bratislava, Slovakia

4Institute of Laboratory Medicine, Clinical Chemistry and Molecular Diagnostics, University of Leipzig, Germany

5Integrated Research and Treatment Center (IFB) Adiposity Diseases, University of Leipzig, Philipp-Rosenthal-Straße 27, 04103 Leipzig, Germany

6LIFE Leipzig Research Center for Civilization Diseases, University of Leipzig, Philipp-Rosenthal-Straße 27, 04103 Leipzig, Germany

*Corresponding author:*

Prof. Dr. Antje Körner, MD

Center for Pediatric Research

Hospital for Children & Adolescents

University of Leipzig

Liebigstraße 21, 04103 Leipzig, Germany

phone: +49-341-9726500

fax: +49-341-9726509

email: antje.koerner@medizin.uni-leipzig.de

**Table S1. Phenotype characterization of the cohort of children and adolescents**

|  | **Whole group (n)** | **BMI categories** | | | |
| --- | --- | --- | --- | --- | --- |
|  | **Normal weight** | **Overweight** | **Obese** | **p (ANOVA)** |
| **Age (years)** | 10.3 ± 3.6 (1325) | 10 ± 3.7 (1020) | 10.9 ± 3.0 (99) | 11.3 ± 3.0 (206) | **<0.001** |
| **Pubertal category*** | 0.6 ± 0.6 (1242) | 0.5 ± 0.6 (962) | 0.8 ± 0.7 (95) | 0.8 ± 0.7 (185) | **<0.001** |
| **Height-SDS** | 0.21 ± 1.01 (1322) | 0.07 ± 0.95 (1017) | 0.56 ± 1.00 (99) | 0.73 ± 1.06 (206) | **<0.001** |
| **BMI-SDS** | 0.37 ± 1.22 (1322) | -0.17 ± 0.75 (1017) | 1.57 ± 0.18 (99) | 2.47 ± 0.44 (206) | **<0.001** |
| **Percentage of body fat (%)** | 20.2 ± 10.8 (295) | 15.8 ± 7.2 (228) | 29.0 ± 5.0 (16) | 36.9 ± 6.7 (51) | **<0.001** |
| **Systolic blood blood pressure SDS** | 0.20 ± 0.74 (1307) | 0.16 ± 0.73 (1003) | 0.24 ± 0.85 (98) | 0.36 ± 0.70 (206) | **<0.001** |
| **Diastolic blood pressure SDS** | 0.35 ± 0.56 (1307) | 0.31 ± 0.58 (1003) | 0.40 ± 0.55 (98) | 0.51 ± 0.46 (206) | **<0.001** |
| **total cholesterol (mmol/L)** | 4.2 ± 0.7 (1257) | 4.2 ± 0.7 (1002) | 4.3 ± 0.7 (90) | 4.3 ± 0.7 (165) | 0.569 |
| **HDL cholesterol (mmol/L)** | 1.6 ± 0.4 (1259) | 1.6 ± 0.4 (1003) | 1.4 ± 0.3 (90) | 1.3 ± 0.3 (166) | **<0.001** |
| **triglycerides (mmol/L)** | 0.8 ± 0.5 (1256) | 0.7 ± 0.4 (1000) | 0.9 ± 0.4 (90) | 1.1 ± 0.6 (166) | **<0.001** |
| **HbA1c (%) (mmol/mol)** | 5.0 ± 0.3 (31.1 ± 3.3) (1250) | 4.9 ± 0.3 (30.1 ± 3.3) (1008) | 5.0 ± 0.2 (31.1 ± 2.2) (87) | 5.0 ± 0.3 (31.1 ± 3.3) (155) | **<0.001** |
| **Fasting serum glucose(mmol/L)** | 4.7 ± 0.4 (1250) | 4.7 ± 0.4 (997) | 4.8 ± 0.4 (91) | 4.9 ± 0.3 (162) | **<0.001** |
| **2h oGTT glucose(mmol/L)** | 5.9 ± 1.1 (246) | 5.4 ± 1.0 (106) | 5.9 ± 1.1 (18) | 6.3 ± 1.0 (122) | **<0.001** |
| **TyG** | 7.9 ± 0.5 ( 1241) | 7.8 ± 0.4 (993) | 8 ± 0.4 (89) | 8.2 ± 0.5 (159) | **<0.001** |
| **Fasting serum insulin (pmol/L)** | 71.1 ± 51.6 (490) | 49.9 ± 27.5 (335) | 96.7 ± 46.4 (28) | 121.2 ± 63.2 (127) | **<0.001** |
| **2h oGTT insulin (pmol/L)** | 568.0 ± 606.0 (239) | 300.1 ± 218.9 (104) | 662.1 ± 635.4 (17) | 790.5 ± 731.1 (118) | **<0.001** |
| **INSmax** | 1063.9 ± 805.5 (233) | 638.1 ± 368.7(104) | 1314.7 ± 983.1 (16) | 1420.3 ± 885.4 (113) | **<0.001** |
| **HOMA-IR** | 2.2 ± 1.7 ( 474) | 1.6 ± 0.9 (323) | 3.1 ± 1.5 (28) | 3.9 ± 2.0 (123) | **<0.001** |
| **WBISI-Matsuda** | 4.9 ± 3.4 ( 219) | 7 ± 3.7 (101) | 3.7 ± 2.1 (15) | 3 ± 1.8 (103) | **<0.001** |
| **AUCINS/AUCGLU** | 95.1 ± 67.7 ( 218) | 61.9 ± 33.7 (100) | 122.8 ± 90.3 (15) | 123.4 ± 74.4 (103) | **<0.001** |
| **Sclerostin (pg/mL)** | 69.6 ± 31.3 (1323) | 66.1 ± 29.5 (1019) | 72.0 ± 33.6 (98) | 85.5 ± 33.8 (206) | **<0.001** |
| **Osteoprotegerin (pg/mL)** | 308.7 ± 81.6 (1325) | 313.2 ± 82.3 (1020) | 294.1 ± 88.9 (99) | 293.3 ± 71.8 (206) | **0.001** |
| **Bone alkaline phosphatase (ng/mL)** | 40.9 ± 18.5 (1324) | 40.3 ± 18.1 (1019) | 42.5 ± 18.4 (99) | 42.8 ± 20.3 (206) | **0.145** |

Data are expressed as mean ± SD. Significant differences (p<0.05) are marked in bold. Abbreviations: body mass index (BMI), insulin-like growth factor 1 (IGF1), insulin-like growth factor binding protein 3 (IGFBP3), 120-minute values of glucose during a 75g oral glucose-tolerance test (2h oGTT glucose value); product of triglycerides and fasting glucose (TyG), 120-minute values of insulin during a 75g oral glucose-tolerance test (2h oGTT insulin value); Peak insulin level during an oGTT (INSmax); Homeostatic model assessment - insulin resistance (HOMA-IR); whole body insulin sensitivity index (WBISI Matsuda). ratio of areas under the curve for insulin and glucose levels during a 75g oral glucose-tolerance test (AUCINS/AUCGLU); *Pubertal category: 0=prepubertal, 1=pubertal, 2=postpubertal (adolescent).

**Table S2. Selected insulin secretion and insulin resistance indices**

| **Index** | **Description** | **Calculation** | **Units** | **References** |
| --- | --- | --- | --- | --- |
| **INS0** | Fasting serum insulin | INS0 | INS (pmol/l) | Hanson RL et al. Am J Epidemiol 2000;151:190-198 |
| **HOMA-IR** | Homeostatic model assessment - insulin resistance | G0*INS0/22.5 | G (mmol/L); INS (μU/mL) | Matthews DR et al. Diabetologia 1985;28:412-419 |
| **TyG** | Product of fasting triglycerides and glucose levels | ln(TG*INS0+logG0] | G (mg/dL); TG (mg/dL) | Simental-Mendia LE et al. Metab Syndr Relat Disord 2008;6:299-304 |
| **INS120** | 120-minute insulin during an oGTT | INS120 | INS (pmol/l) | Hanson RL et al. Am J Epidemiol 2000;151:190-198 |
| **INSmax** | Peak insulin level during an oGTT | INSmax | INS (pmol/l) | Reaven GM et al. J Clin Endocrinol Metab 1993;76:44-48 |
| **AUCINS/ AUCGLU** | Ratio of areas under the curve for insulin and glucose levels during an oGTT | AUCINS/AUCGLU | G (mmol/L); INS (pmol/L) | Retnakaran R et al. Diabet Med 2009;26:1198-1203 |
| **WBISI Matsuda** | Whole body insulin sensitivity index | 10000/SQRT | G (mg/dL); INS (μU/mL) | Matsuda M et al. Diabetes Care 1999;22:1462-1470 |
| ((G0*INS0)* |
| (Gmean*INSmean)) |

Abbreviations: glucose (G), fasting glucose (G0), insulin (INS), TG – triglycerides, Gmean – mean glucose levels during an oral glucose-tollerance test (oGTT), INSmean – mean insulin levels during an oral glucose-tollerance test.

**Table S3. Linear multiple regression analyses for sclerostin, osteoprotegerin and co-factors**

| **Step** | **Parameter** | **ΔR2** | **β±SEM** | **p value** |
| --- | --- | --- | --- | --- |
|
| **Dependent variable: sclerostin (R2 = 0.03; P < 0.001; n = 1237)** | | | | |
| **1** | BMI SDS | 0.027 | 0.14 ± 0 | **<0.001** |
| **2** | Height SDS | 0.006 | 0.08 ± 0 | **0.004** |
| **Dependent variable: osteoprotegerin (R2 = 0.04; P < 0.001; n = 1237)** | | | | |
| **1** | Age | 0.032 | -0.13 ± 0 | **0.003** |
| **2** | BMI SDS | 0.008 | -0.07 ± 0 | **0.012** |
| **3** | Height SDS | 0.001 | -0.04 ± 0 | 0.218 |
| **4** | Sex | 0.001 | 0.04 ± 0 | 0.199 |
| **5** | Pubertal status | 0.001 | -0.05 ± 0.01 | 0.259 |
| **Dependent variable: B-ALP (R2 = 0.19; P < 0.001; n = 1238)** | | | | |
| **1** | Age | 0.116 | -0.22 ± 0.04 | **<0.001** |
| **2** | Height SDS | 0.035 | 0.18 ± 0.03 | **<0.001** |
| **3** | Sex | 0.031 | -0.17 ± 0.03 | **<0.001** |
| **4** | Pubertal status | 0.008 | -0.15 ± 0.04 | **<0.001** |
| **5** | BMI SDS | 0.001 | 0.04 ± 0.03 | 0.161 |

Independent variables for the model: sex, age, BMI SDS, and pubertal status.

Abbreviations: body mass index (BMI); standard deviation score (SDS).

**Table S4. Linear multiple regression analyses for height, sclerostin and osteoprotegerin**

| **Step** | **Parameter** | **ΔR2** | **β±SEM** | **p value** |
| --- | --- | --- | --- | --- |
|
| **Dependent variable: height SDS (R2 = 0.17; P < 0.001; n = 1211)** |  |  |  |  |
| **1** | BMI SDS | 0.087 | 0.22 ± 0.03 | **<0.001** |
| **2** | IGF1_SDS | 0.039 | 0.25 ± 0.03 | **<0.001** |
| **3** | Bone alkaline phosphatase | 0.028 | 0.15 ± 0.03 | **<0.001** |
| **4** | Sex | 0.011 | -0.12 ± 0.03 | **<0.001** |
| **5** | Osteoprotegerin | 0.003 | -0.08 ± 0.03 | **0.003** |
| **6** | Sclerostin | 0.004 | 0.07 ± 0.03 | **0.012** |

Independent variables for the model: sex, age, BMI SDS, pubertal status, IGF1 SDS, IGFBP3 SDS, sclerostin, osteoprotegerin, and bone alkaline phosphatase. The significant correlations (p<0.05) are marked in bold. Abbreviations: body mass index (BMI); standard deviation score (SDS); insulin-like growth factor 1 (IGF1), insulin-like growth factor binding protein 3 (IGFBP3).

**
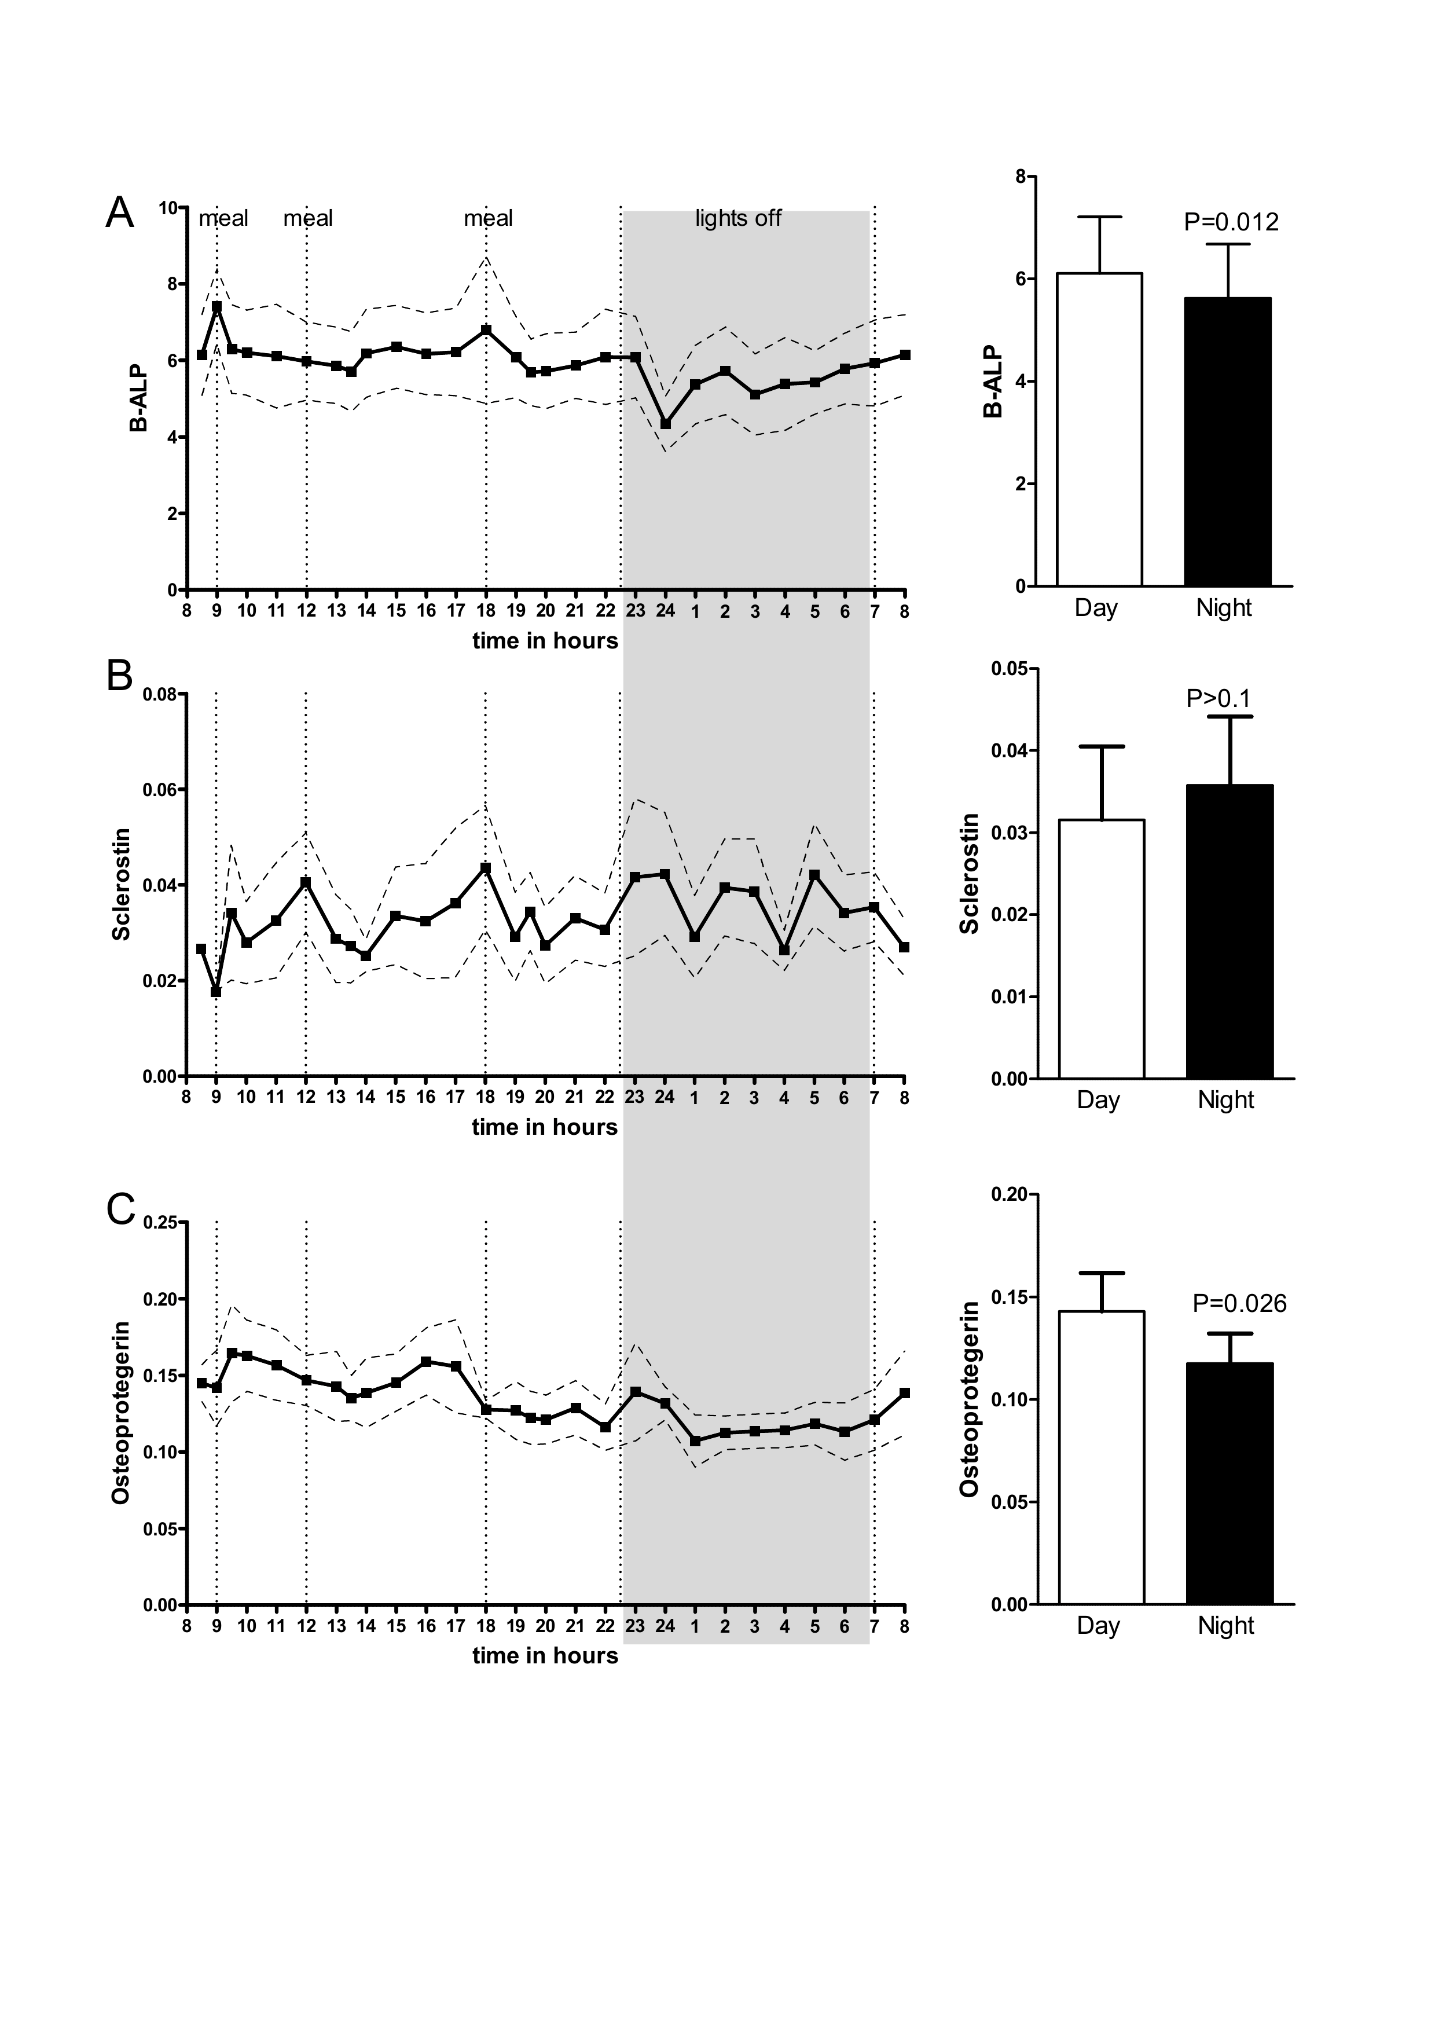
**

**Figure S1. Diurnal variation of bone markers.** Profiles of diurnal variation of serum levels of bone markers were done by hourly sampling of serum aliquots over 24h of 4 probands and are shown as mean and SEM. Times of meals and period with lights off are indicated by dotted lines and shaded area. Paired t-test was performed for assessment of serum levels during the light period (0800 to 2200) and light off period (2200 to 0700).


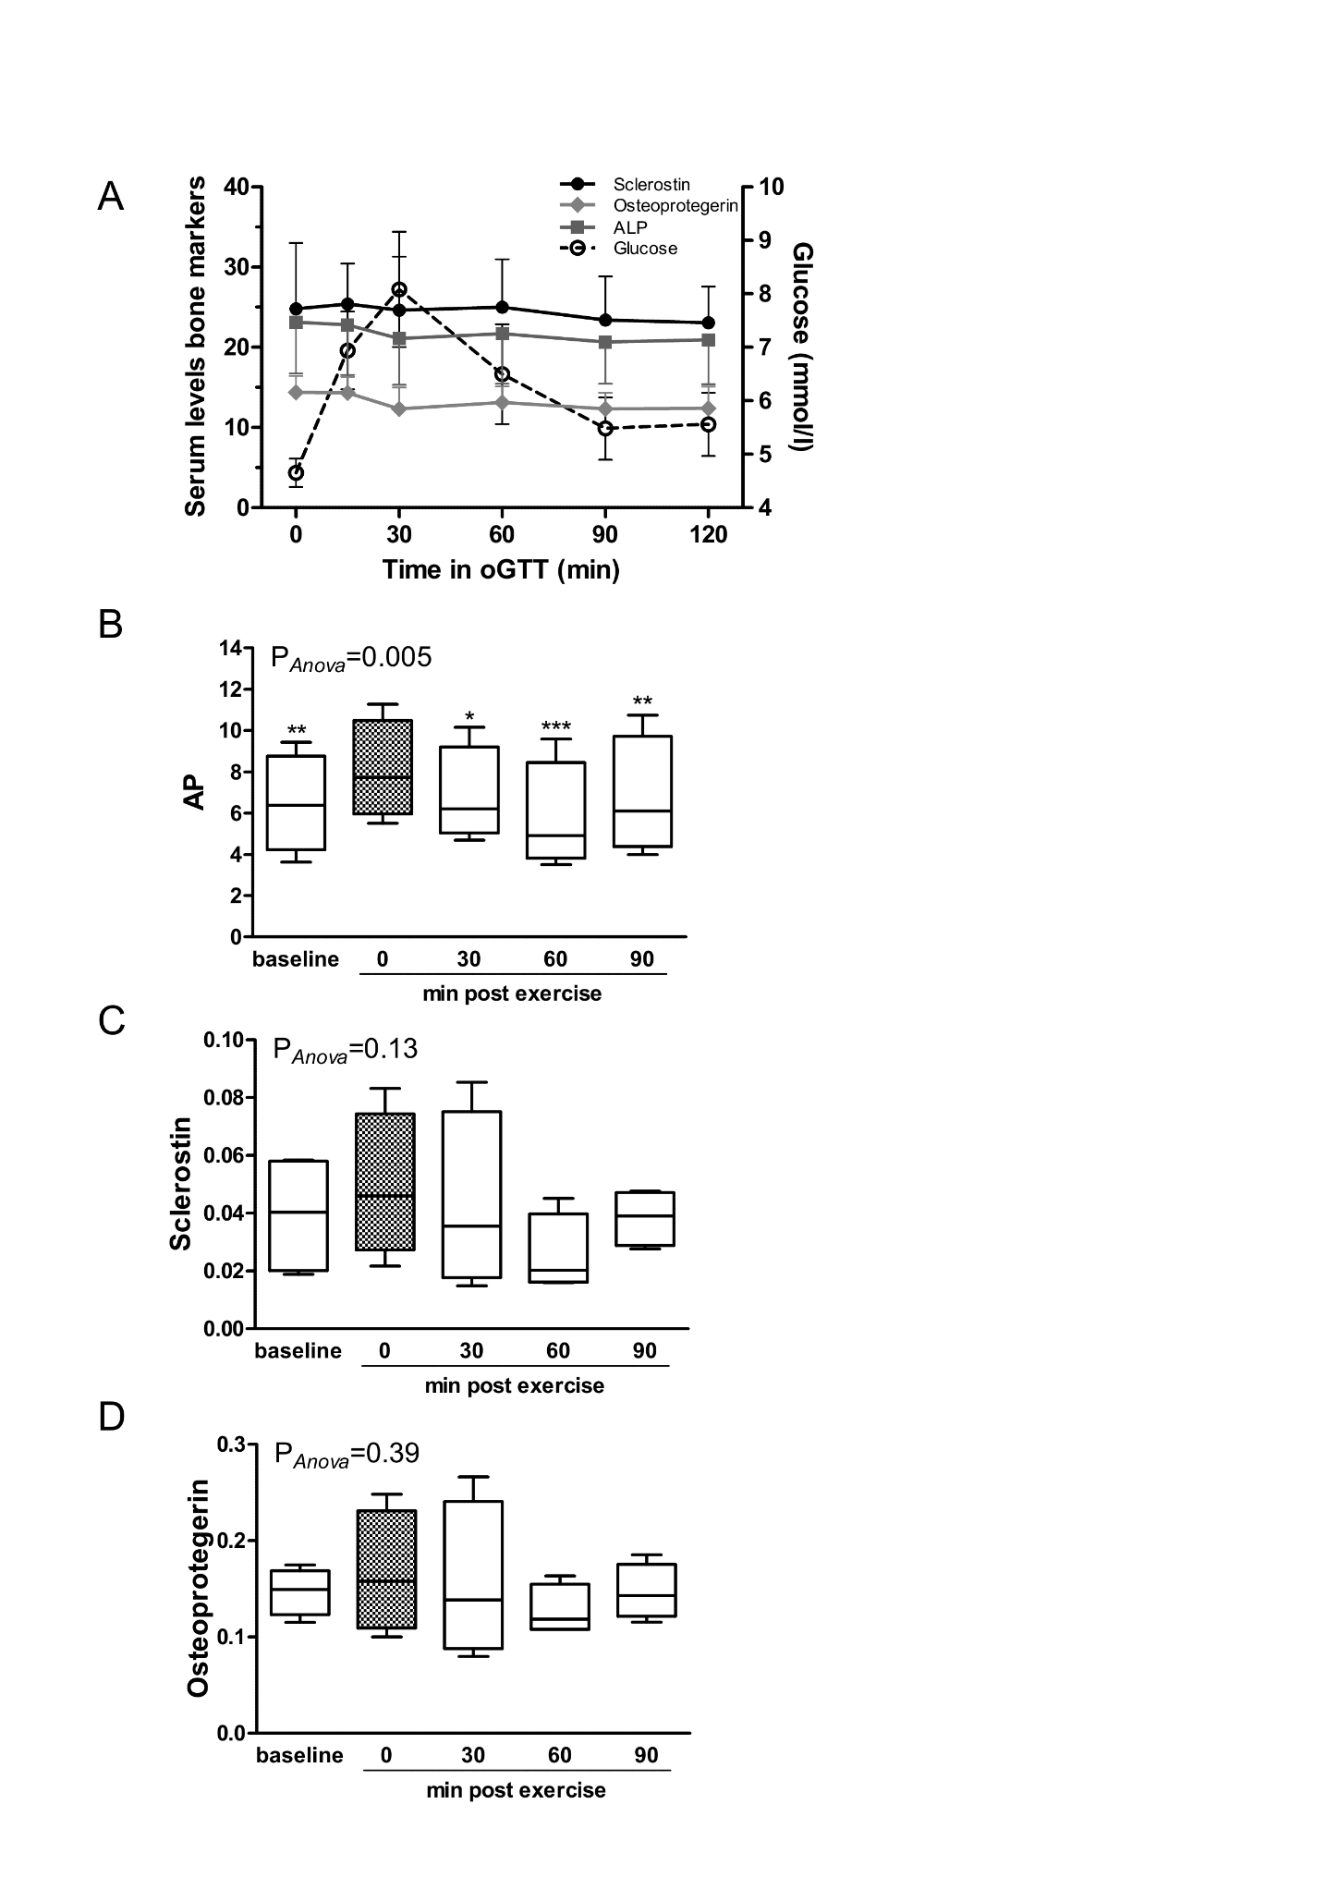


**Figure S2. Effect of exogenous stimuli on bone markers.** A) oGTT. Eleven lean probands underwent standardized oGTT with 75g Glucose. Course of serum levels of bone markers is indicated in mean±SEM. (B-D) Serum levels are given before (baseline), immediately after (0) and every 30 min following a bout of acute strenuous exercise in 4 adult probands. Statistical analysis was performed by ANOVA repeated measures test applying Dunnett´s post test with 0 as reference.

**Table S5. Linear multiple regression analyses for selected parameters of glucose and insulin metabolism with sclerostin and osteoprotegerin**

| **Step** | **Parameter** | **ΔR2** | **β±SEM** | **p value** |
| --- | --- | --- | --- | --- |
| **Independent variables for all models: sex, age, BMI SDS, height SDS, pubertal status, HbA1c, B-ALP, sclerostin, and osteoprotegerin** | | | | |
| **Dependent variable: fasting glucose (R2 = 0.18; P < 0.001; n = 1172)** | | | | |
| **1** | age | 0.137 | 0.42 ± 0.03 | ***<0.001*** |
| **2** | B-ALP | 0.023 | 0.13 ± 0.03 | ***<0.001*** |
| **3** | sex | 0.014 | -0.13 ± 0.03 | ***<0.001*** |
| **4** | BMI SDS | 0.010 | 0.10 ± 0.03 | ***<0.001*** |
| **Dependent variable: 2h oGTT glucose (R2 = 0.12; P < 0.001; n = 235)** | | | | |
| **1** | BMI SDS | 0.110 | 0.32 ± 0.06 | ***<0.001*** |
| **2** | B-ALP | 0.018 | 0.17 ± 0.06 | **0.027** |
| **Dependent variable: TyG (R2 = 0.14; P < 0.001; n = 1163)** | | | | |
| **1** | BMI SDS | 0.068 | 0.21 ± 0.03 | ***<0.001*** |
| **2** | Pubertal category | 0.047 | 0.17 ± 0.04 | ***<0.001*** |
| **3** | Sclerostin | 0.010 | 0.12 ± 0.03 | ***<0.001*** |
| **4** | sex | 0.010 | 0.08 ± 0.03 | 0.004 |
| **5** | B-ALP | 0.006 | 0.09 ± 0.03 | 0.002 |
| **6** | age | 0.002 | 0.07 ± 0.04 | 0.096 |
| **Dependent variable: fasting insulin (R2 = 0.60; P < 0.001; n = 461)** | | | | |
| **1** | BMI SDS | 0.395 | 0.60 ± 0.03 | ***<0.001*** |
| **2** | age | 0.180 | 0.39 ± 0.05 | ***<0.001*** |
| **3** | sex | 0.011 | 0.14 ± 0.03 | ***<0.001*** |
| **4** | B-ALP | 0.019 | 0.15 ± 0.03 | ***<0.001*** |
| **5** | Pubertal category | 0.003 | 0.08 ± 0.05 | 0.058 |
| **Dependent variable: 2h oGTT insulin (R2 = 0.40; P < 0.001; n = 228)** | | | | |
| **1** | BMI SDS | 0.255 | 0.50 ± 0.05 | ***<0.001*** |
| **2** | age | 0.080 | 0.33 ± 0.06 | ***<0.001*** |
| **3** | Sclerostin | 0.031 | 0.13 ± 0.06 | **0.018** |
| **4** | sex | 0.014 | 0.14 ± 0.06 | **0.014** |
| **5** | B-ALP | 0.011 | 0.11 ± 0.06 | 0.064 |
| **6** | Osteoprotegerin | 0.006 | 0.09 ± 0.06 | 0.112 |
| **Dependent variable: INSmax (R2 = 0.37; P < 0.001; n = 222)** | | | | |
| **1** | BMI SDS | 0.283 | 0.52 ± 0.05 | ***<0.001*** |
| **2** | age | 0.075 | 0.32 ± 0.06 | ***<0.001*** |
| **3** | B-ALP | 0.016 | 0.14 ± 0.06 | 0.019 |
| **4** | Sclerostin | 0.009 | 0.09 ± 0.06 | 0.094 |
| **5** | sex | 0.005 | 0.07 ± 0.06 | 0.183 |
| **Dependent variable: HOMA-IR (R2 = 0.55; P < 0.001; n = 445)** | | | | |
| **1** | BMI SDS | 0.400 | 0.61 ± 0.03 | ***<0.001*** |
| **2** | age | 0.138 | 0.33 ± 0.05 | ***<0.001*** |
| **3** | sex | 0.005 | 0.09 ± 0.03 | ***0.005*** |
| **4** | B-ALP | 0.007 | 0.10 ± 0.04 | **0.007** |
| **5** | Pubertal category | 0.002 | 0.08 ± 0.05 | 0.133 |
| **Dependent variable: AUCINS/AUCGLU (R2 = 0.44; P < 0.001; n = 207)** | | | | |
| **1** | BMI SDS | 0.271 | 0.5 ± 0.05 | ***<0.001*** |
| **2** | age | 0.128 | 0.4 ± 0.06 | ***<0.001*** |
| **3** | Sclerostin | 0.030 | 0.15 ± 0.05 | ***0.004*** |
| **4** | B-ALP | 0.011 | 0.15 ± 0.06 | **0.012** |
| **5** | sex | 0.017 | 0.14 ± 0.06 | **0.012** |
| **Dependent variable: WBISI Matsuda (R2 = 0.61; P < 0.001; n = 208)** | | | | |
| **1** | BMI SDS | 0.424 | -0.64 ± 0.04 | ***<0.001*** |
| **2** | age | 0.147 | -0.44 ± 0.05 | ***<0.001*** |
| **3** | B-ALP | 0.026 | -0.2 ± 0.05 | ***<0.001*** |
| **4** | sex | 0.014 | -0.12 ± 0.05 | **0.009** |
| **5** | Sclerostin | 0.008 | -0.09 ± 0.04 | 0.046 |

Excluded were underweight individuals. The significant correlations (p<0.05) are marked in bold, and significant correlations after the Bonferroni correction (p<0.006) and marked both in bold and in Italic. Abbreviations: body mass index (BMI); standard deviation score (SDS); 120-minute values of glucose during a 75g oral glucose-tolerance test (2h oGTT glucose value); product of triglycerides and fasting glucose (TyG),120-minute values of insulin during a 75g oral glucose-tolerance test (2h oGTT insulin value); Peak insulin level during an oGTT (INSmax); Homeostatic model assessment - insulin resistance (HOMA-IR); ration of areas under the curve for insulin and glucose levels during a 75g oral glucose-tolerance test (AUCINS/AUCGLU); whole body insulin sensitivity index (WBISI Matsuda).
